# Supplementary material for: Tactile Motion and Pattern Processing Assessed with High-Field fMRI
Source: PubMed Central journal article supplement (PMC3174219; doi:10.1371/journal.pone.0024860), 2011-09-15

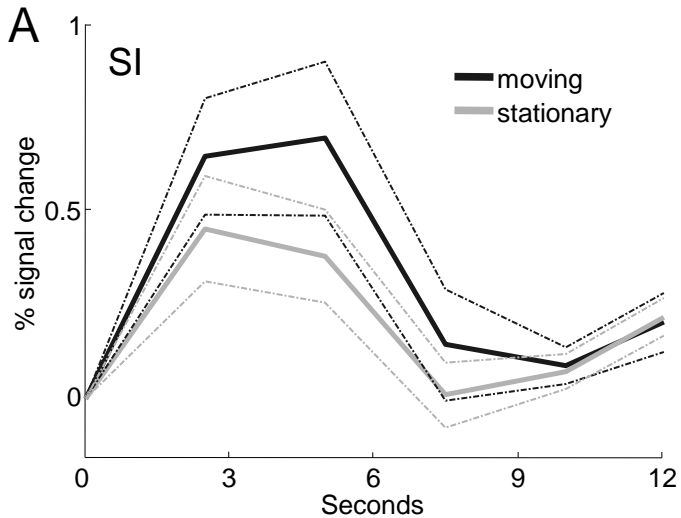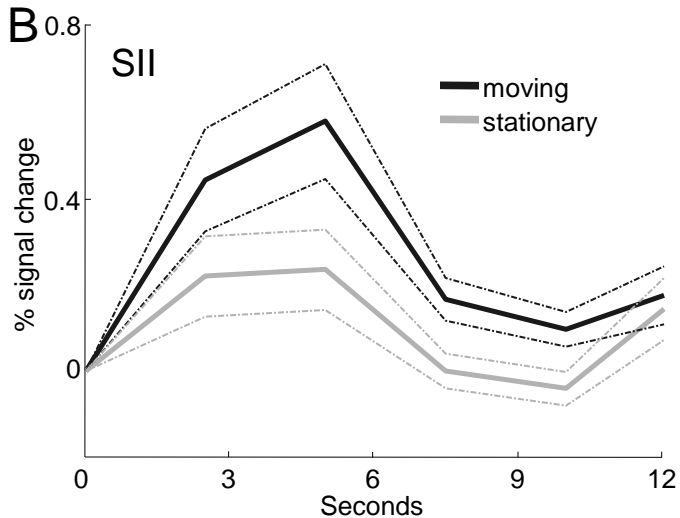

Supplement: pone.0024860.s001.pdf [file pone.0024860.s001.pdf]
